# Supplementary material for: Cognitive Reactivity, Implicit Associations, and the Incidence of Depression: A Two-Year Prospective Study
Source: PLoS One. 2013 Jul 26;8(7):e70245. doi: 10.1371/journal.pone.0070245 (PMC3724814; doi:10.1371/journal.pone.0070245)
Supplement: Table S2 — Correlation matrix. * = p≤.05; ** = p≤.01; *** = p≤.001. DD incidence = incidence of depressive disorders, family history = family history of anxiety and/or depression, NLE = Negative Life Events; IDS-SR = Inventory of Depressive Symptomatology – Self Report; Neuroticism = neuroticism subscale of the NEO-FFI; ISDA = Implicit Self-Depressed Associations (IAT); CR = Cognitive Reactivity (LEIDS-R). (DOCX) [file pone.0070245.s003.docx]

|  | 1. | 2. | 3. | 4. | 5. | 6. | 7. | 8. | 9. | 10. | 11. |
| --- | --- | --- | --- | --- | --- | --- | --- | --- | --- | --- | --- |
| 1. DD incidence | - |  |  |  |  |  |  |  |  |  |  |
| 2. sexe | .037 | - |  |  |  |  |  |  |  |  |  |
| 3. age | -.033 | -.076* | - |  |  |  |  |  |  |  |  |
| 4. education (yrs) | -.083* | -.052 | -.057 | - |  |  |  |  |  |  |  |
| 5. lifetime anxiety | .206*** | .072* | .031 | -.074* | - |  |  |  |  |  |  |
| 6. family history | .061 | .078* | -.117*** | -.071* | .137*** | - |  |  |  |  |  |
| 7*. n* NLE | .172*** | .060 | .027 | -.056 | .075* | .104** | - |  |  |  |  |
| 8. IDS-SR | .344*** | .123*** | .073* | -.192*** | .482*** | .151*** | .119** | - |  |  |  |
| 9. neuroticism | .271*** | .129*** | -.107** | -.114*** | .471*** | .196*** | .099** | .730*** | - |  |  |
| 10. ISDA | -.105** | -.095** | -.047 | .029 | -.222*** | -.054 | -.046 | -.277*** | -.307*** | - |  |
| 11. CR | .296*** | .061 | -.075* | .057 | .334*** | .163*** | .132*** | .519*** | .573*** | -.231*** | - |
